# Supplementary material
Source: PubMed Central journal article supplement (PMC5425400)
Supplement: mmc1.pdf [file mmc1.pdf]

**Biophysical Journal, Volume 112**

**Supplemental Information**

**Integrated Analysis of Intracellular Dynamics of Men1NV Cancer Cells  
in a 3D Matrix**

**Michael Mak, Sarah Anderson, Meghan C. McDonough, Fabian Spill, Jessica E. Kim, Alexandra Boussohier-Calleja, Muhammad H. Zaman, and Roger D. Kamm**

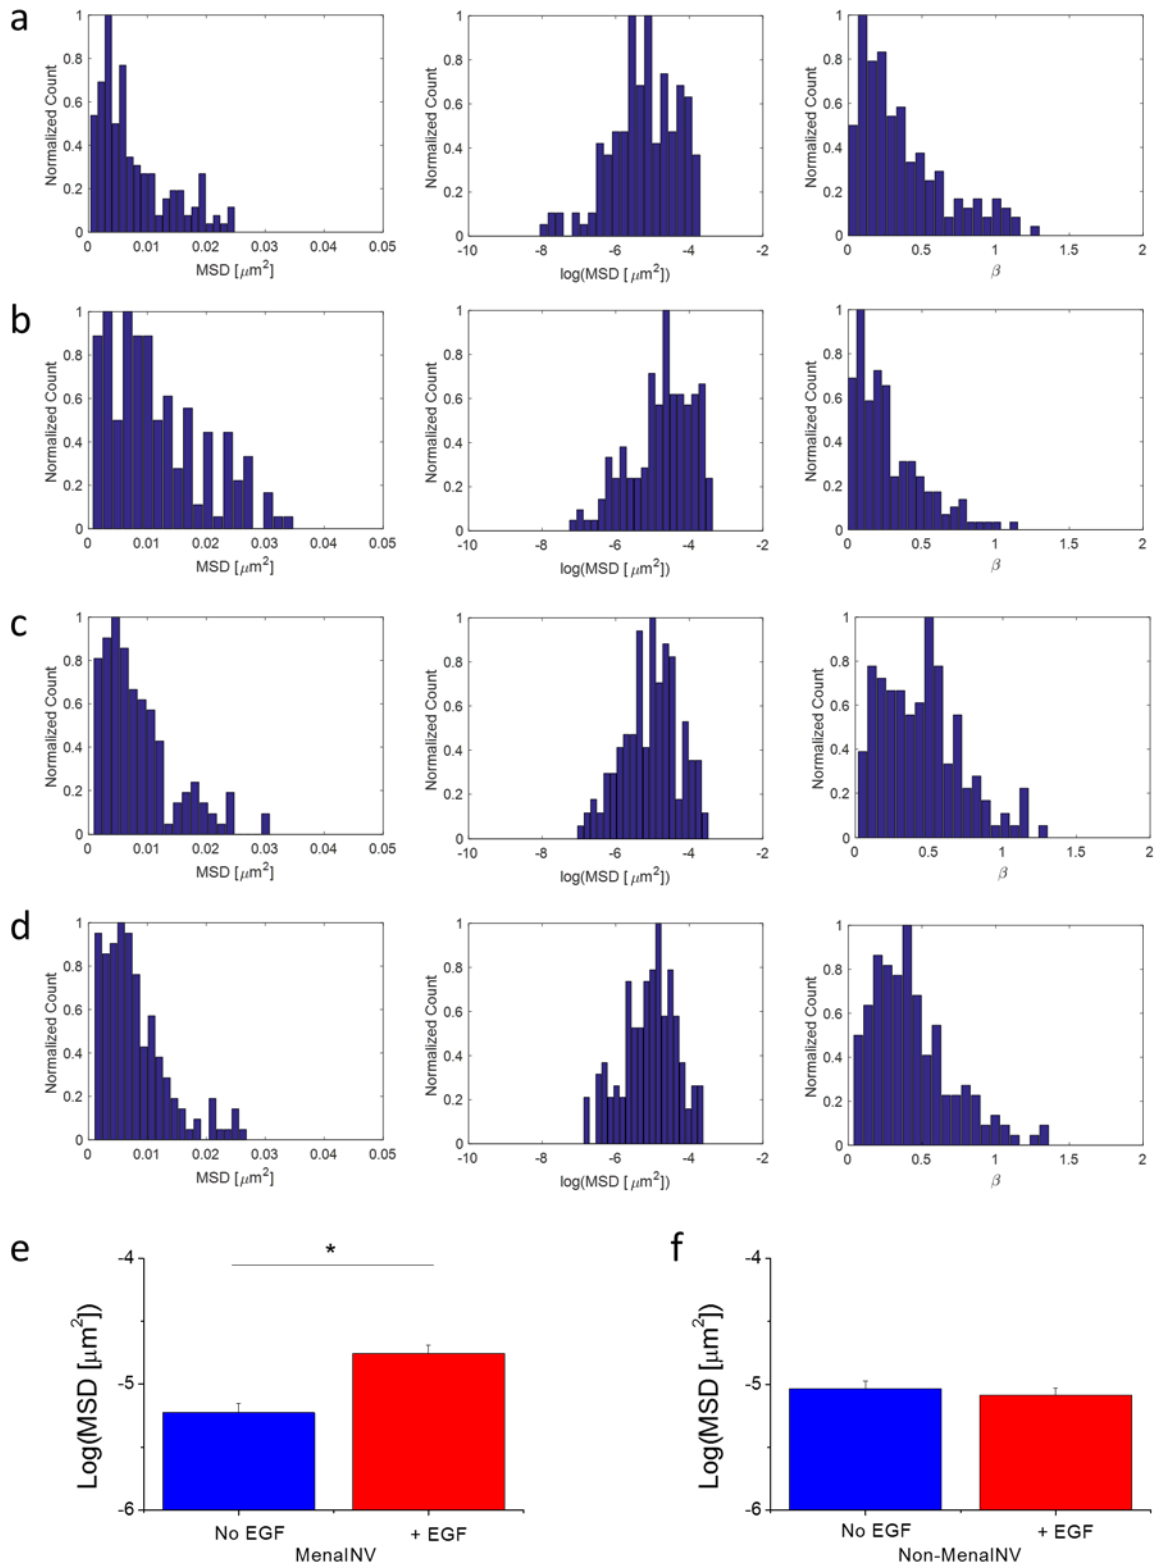

SI Figure 1: Distributions of MSDs and  $\beta$ 's. Normalized distributions for MSD at 0.05s,  $\log(\text{MSD})$  at 0.05s, and  $\beta$  at 1s for MDA-MB-231 cells with the conditions: (a) MenaINV overexpression and no EGF, (b) MenaINV overexpression and 5nM EGF, (c) non-MenaINV overexpression and no EGF, and (d) non-MenaINV overexpression and 5nM EGF. Comparison of the ensemble averaged  $\log(\text{MSD})$  at  $t = 0.05\text{s}$  between with and without EGF stimulation for cells (e) with MenaINV overexpression and (f) without MenaINV overexpression. \* indicates  $p < 0.01$ .

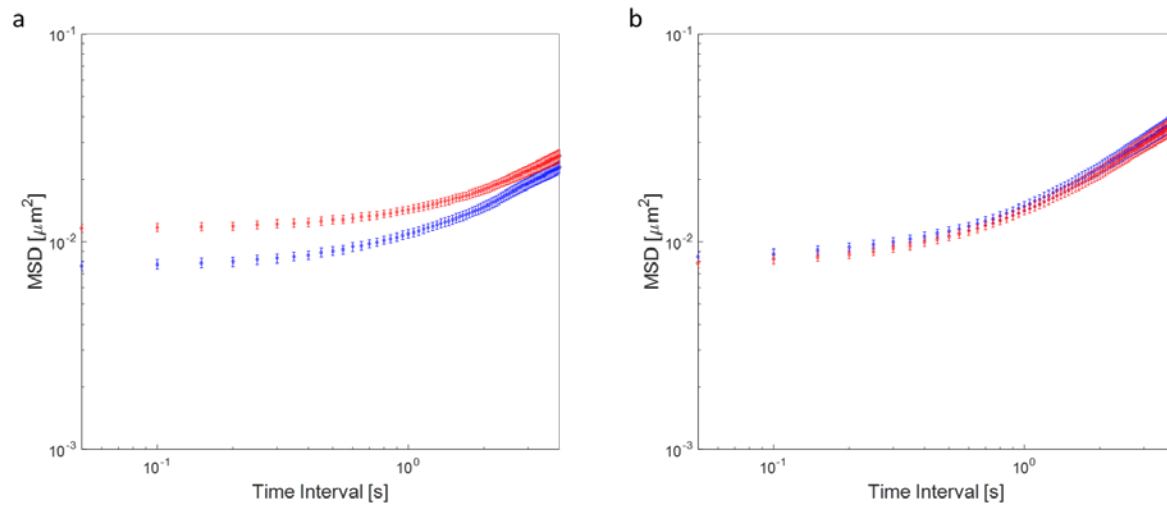

SI Figure 2: MSDs with error bars. MSDs of MDA-MB-231 cells (a) with overexpression of Men1NV and (b) without overexpression of Men1NV. Red corresponds to treatment with EGF and blue corresponds to no treatment. Error bars are s.e.m.

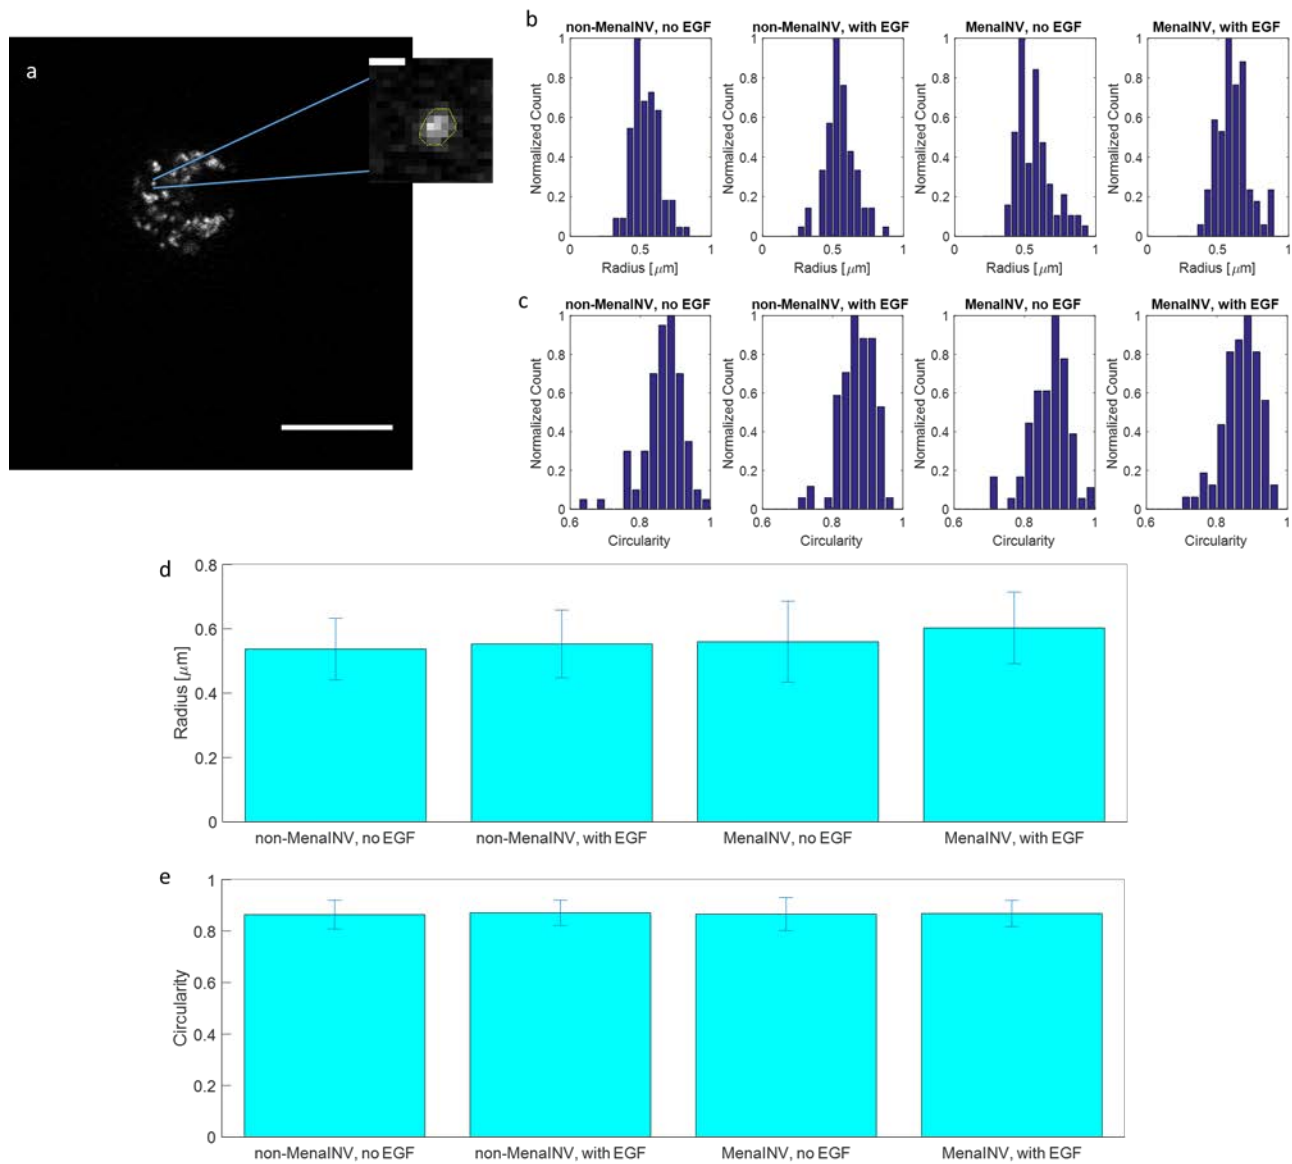

SI Figure 3: Mitochondria size and shape. a) Labeled mitochondria were manually segmented (inset) and their size and shape parameters were calculated. Specifically, we computed the circularity, defined as  $4\pi \text{ area}/\text{perimeter}^2$ , and the radius of the circle with equivalent area to the segmented shape. Scale bar of the larger image is  $20\mu\text{m}$  and scale bar of the inset is  $1\mu\text{m}$ . b, c) Normalized distributions of the calculated radii (b) and circularity (c) for each experimental condition tested ( $n \geq 80$  mitochondria for each condition). d, e) Average radius (d) and circularity (e) for each experimental condition. Error bars are standard deviations.
